# Supplementary material
Source: MDPI journal article supplement (https://www.mdpi.com/2071-1050/10/12/4745)
Supplement: s1 [file s1]

**Document S2: Registration sheet for the binding land use plans for inner urban development, complementary to table for acquisition (Table S1)**

**1. General information**

- Plan No. \_\_\_\_\_

Denotation: \_\_\_\_\_

- Aim of the binding land use plan for inner urban development (§ 13a (1), s. 1 FBC)?
  - a) Re-use of areas
  - b) Posturbanisation
  - c) Other measures of inner urban development: \_\_\_\_\_
- Allowed plot coverage rate according to § 19 (2) FBC resp. expected sealed surface?
  - a) < 20.000 m<sup>2</sup>
  - b) 20.000 to 70.000 m<sup>2</sup>

**2. Information about the procedure**

Stage of the procedure:

Plan preparatory decision:

Decision on bye-law:

Remarks:

**3. Application of the acceleration effects**

- Waiver of early participation of public authorities and public agencies (reasons)?

Implementation of public display or alternative request the affected public to comment within a reasonable time (reasons)?

- Implementation of public authorities participation or alternative request the affected public authorities to comment within a reasonable time (reasons)?

- Change of the preparatory land use plan necessary (starting and ending representation of usage types)?

- Was the procedure felt as accelerated?

**4. Details on explicit costs of planning resp. Implementation of planning**

**5. Alternatives**

- Would the area have been developed without the accelerated procedure?
- Would the development have taken place elsewhere?

**6. Contact details for queries**

- Developer:
- Planning office:

**7. Remarks**

**Table S3:** Non-procedural private costs for the land development case for the example of a former military property of 55,604 m<sup>2</sup> in the Hanseatic City of Stralsund. The representation is made only as far as data was available and is therefore probably underestimated.

| <b>Cost item</b>                                                 | <b>Gross-Costs in € (Estimated)</b> |
|------------------------------------------------------------------|-------------------------------------|
| <b>A) Costs for specialist planning and expert opinions</b>      | <b>130,000</b>                      |
| Planning of local public infrastructure                          | 101,000 *                           |
| Noise protection surveys                                         | 4,000                               |
| Surveys of species protection and environmental protection **    | 25,000                              |
| <b>B) Land acquisition costs</b>                                 | <b>&gt;&gt; 80,000</b>              |
| Purchase price of the property plus land                         | Unknown                             |
| Notarial costs                                                   | Unknown                             |
| Measuring costs                                                  | 80,000                              |
| <b>C) Costs of building land preparation</b>                     | <b>1,745,454</b>                    |
| Development costs                                                | 915,000                             |
| Roadmaking and streetlights (public streets)                     | 410,000                             |
| Sanitary sewer and storm water sewer                             | 300,00                              |
| Drinking water pipeline                                          | 70,000                              |
| Gas line                                                         | 65,000                              |
| Electrical connection                                            | 25,000                              |
| Telephone and television cable                                   | 45,000                              |
| Costs of ecological compensation                                 | 115,454                             |
| Compensatory planting and green areas ***                        | 35,000                              |
| Species protection legislation replacement measures (bat roosts) | 26,000                              |
| Reforestation                                                    | 54,454 *                            |
| Costs of required construction and regulatory measures           | 715,000                             |
| Disposal of asbestos                                             | 55,000                              |
| Demolition measures                                              | 550,000                             |
| Remediation of contaminated sites                                | 110,000                             |
| <b>Subsequent costs</b>                                          | <b>no private costs</b>             |
| <b>Total of A)–C)</b>                                            | <b>1,955,454</b>                    |

\* Incurred expenses

\*\* It is not known if this includes the costs for the environmental report & open space plan.

\*\*\* It is not known whether the costs of a compensation area (compensation according to impact regulation) were also taken into account here.
